# Supplementary material for: Resveratrol inhibits release of soluble fms-like tyrosine kinase (sFlt-1) and soluble endoglin and improves vascular dysfunction – implications as a preeclampsia treatment
Source: PubMed Central journal article supplement (PMC5431923; doi:10.1038/s41598-017-01993-w), 2017-05-12
Supplement: 41598_2017_1993_MOESM1_ESM.pdf [file 41598_2017_1993_MOESM1_ESM.pdf]

**Resveratrol inhibits release of soluble fms-like tyrosine kinase (sFlt-1)  
and soluble endoglin and improves vascular dysfunction – implications  
as a preeclampsia treatment**

Natalie J Hannan<sup>1</sup>, Fiona C Brownfoot<sup>1</sup>, Ping Cannon<sup>1</sup>, Minh Deo<sup>1</sup>, Sally  
Beard<sup>1</sup>, Tuong V Nguyen<sup>1</sup>, Kirsten R Palmer<sup>2</sup>, Stephen Tong<sup>1</sup>, Tu'uhevaha J  
Kaitu'u-Lino<sup>1</sup>

<sup>1</sup>Translational Obstetrics Group, The Department of Obstetrics and  
Gynaecology, Mercy Hospital for Women, University of Melbourne, 163  
Studley Rd, Heidelberg 3084, Victoria, Australia

<sup>2</sup>Department of Obstetrics and Gynaecology, Monash University, Monash  
Medical Centre, 246 Clayton Rd, Clayton, 3168, Victoria, Australia

Corresponding author

Tu'uhevaha Kaitu'u-Lino

Mercy Hospital for Women

Dept of Obstetrics and Gynaecology, University of Melbourne

163 Studley Road,

Heidelberg, VIC, 3084.

Telephone: 03 8458 4355

Email: [t.klino@unimelb.edu.au](mailto:t.klino@unimelb.edu.au)

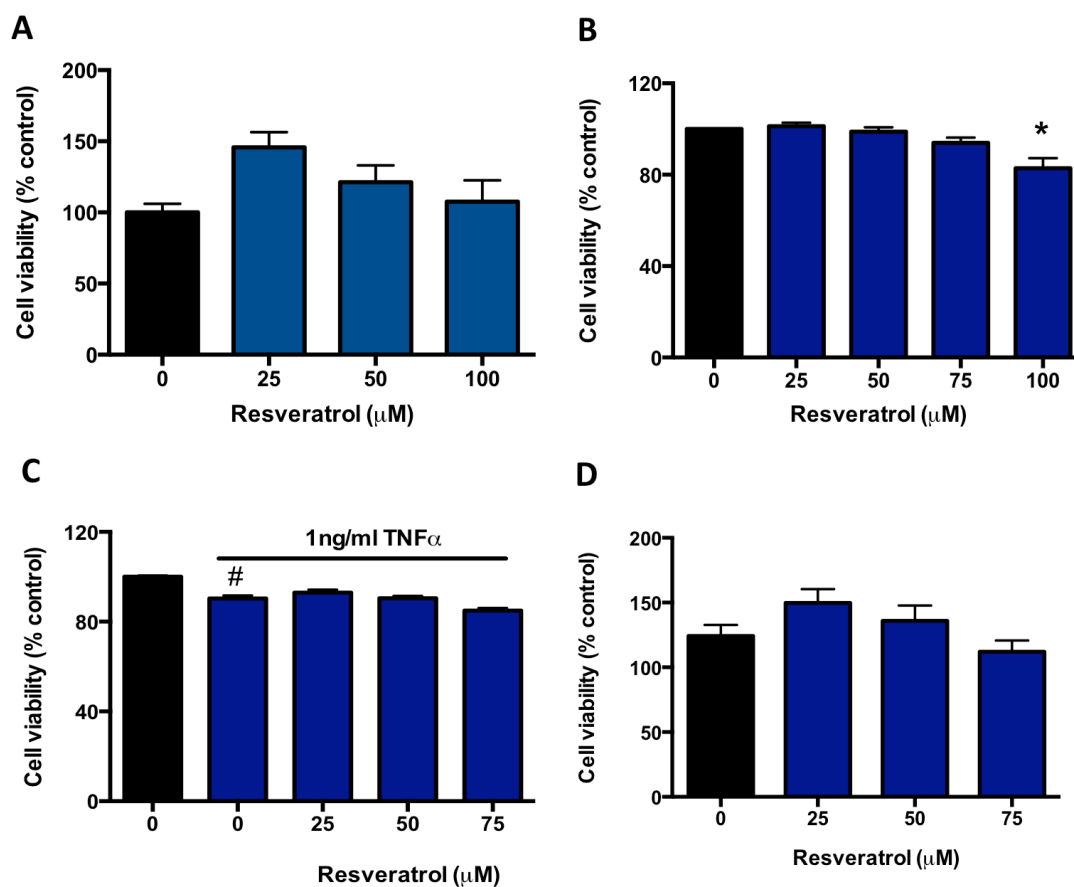

**Supplementary Figure 1:** Effect of resveratrol on cell viability. To determine whether cell viability was altered in the presence of resveratrol, MTS cell viability assays were undertaken for all experiments. **A)** Cell viability on primary trophoblast used for sFlt-1 and sEng secretion and mRNA expression. No significant effects of resveratrol at 25-100 $\mu$ M on cell viability was observed. **B)** Cell viability on primary HUVECs used for measurement of sFlt-1, sEng, IL-1 $\beta$ , IL-6 and TNF $\alpha$  secretion and mRNA expression. A minor but significant reduction in cell viability was observed in primary HUVECs at a dose of 100 $\mu$ M resveratrol. Therefore only doses of 25-75 $\mu$ M were used for experimental analysis. **C)** Cell viability of primary HUVECs used for measurement of sFlt-1 secretion and endothelial dysfunction. TNF $\alpha$  induced a minor but significant reduction in viability compared to control, however no additional reductions were observed in the presence of resveratrol. **D)** Cell viability of primary HUVECs used for protein analysis of HO-1 and eNOS, peNOS. No significant alterations in cell viability were observed.
